# Supplementary material
Source: PubMed Central journal article supplement (PMC2567170)
Supplement: 0805041105_0805041105SI.pdf [file 0805041105_0805041105SI.pdf]

# Supporting Information

Rosenzweig et al. 10.1073/pnas.0805041105

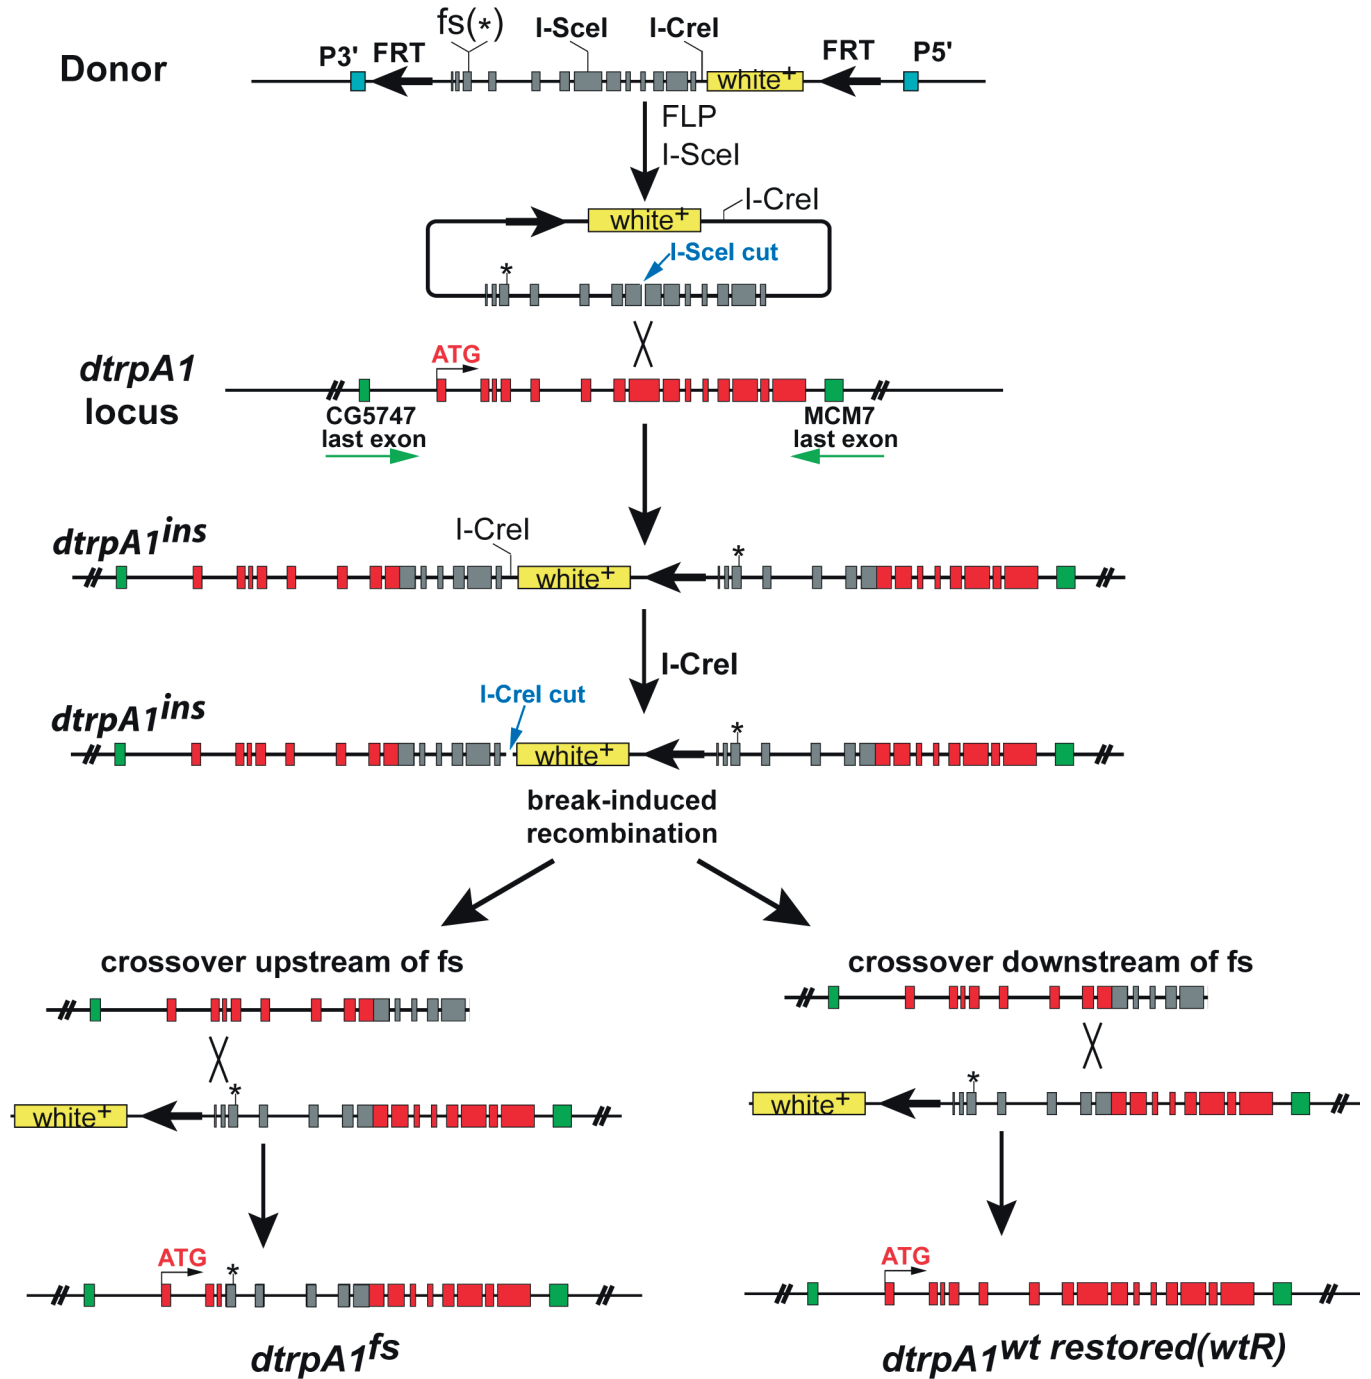

Fig. S1. Generation of *dtrpA1<sup>fs</sup>* mutant and wild-type control (*dtrpA1<sup>wtR</sup>*) strains. *dtrpA1<sup>ins</sup>* was generated via homologous recombination-mediated gene targeting (48). *dtrpA1<sup>ins</sup>* tandem duplication was subsequently reduced to a single copy through I-Cre-I break-induced recombination (29). Recombination upstream of frameshift mutation generated *dtrpA1<sup>fs</sup>*, whereas recombination downstream of frameshift mutation regenerated a wild-type *dtrpA1* allele, *dtrpA1<sup>wtR</sup>*. The *dtrpA1<sup>wtR</sup>* chromosome should be identical to *dtrpA1<sup>ins</sup>* and *dtrpA1<sup>fs</sup>* except for sequences within *dtrpA1*. *dtrpA1<sup>wtR</sup>* serves as a genetic control analogous to the precise excision of a transposon. Letter X denotes approximate crossover locations. Asterisk indicates frameshift mutation in exon 4. See Materials and Methods for details.
